# Supplementary material
Source: publisher figshare collection journal article supplement (https://gsajournals.figshare.com/ndownloader/files/25117376)
Supplement: Supplementary file 1 [file 25117376]

## Sheet: Table S2
Table S5. Gene ontology of mir-44 family germline expressed targets.
Term	RT	Count	%	P-Value	Fold Enrichment
embryo development ending in birth or egg hatching	RT	54	33.3	0.0015	1.5
reproduction	RT	41	25.3	0.0027	1.6
nematode larval development	RT	35	21.6	0.016	1.5
locomotion	RT	33	20.4	0.00018	2
transport	RT	20	12.3	0.0033	2.1
body morphogenesis	RT	14	8.6	0.031	1.9
small GTPase mediated signal transduction	RT	10	6.2	1.8e-06	8.8
oviposition	RT	10	6.2	0.023	2.4
growth	RT	8	4.9	0.0034	4.1
engulfment of apoptotic cell	RT	7	4.3	0.00065	6.6
cell division	RT	6	3.7	0.024	3.7
protein transport	RT	6	3.7	0.026	3.6
cell cycle	RT	6	3.7	0.026	3.6
intracellular signal transduction	RT	6	3.7	0.036	3.3
regulation of locomotion	RT	5	3.1	0.00093	11.3
axon guidance	RT	5	3.1	0.027	4.4
protein ubiquitination	RT	5	3.1	0.035	4
inductive cell migration	RT	5	3.1	0.092	2.9
actin cytoskeleton organization	RT	4	2.5	0.00082	20.9
axon extension	RT	4	2.5	0.01	8.8
regulation of oviposition	RT	4	2.5	0.013	8
mitotic spindle organization	RT	4	2.5	0.037	5.4
vesicle-mediated transport	RT	4	2.5	0.062	4.4
axonal fasciculation	RT	4	2.5	0.089	3.8
negative regulation of cell division	RT	3	1.9	0.0059	25.1
synaptic vesicle transport	RT	3	1.9	0.015	15.7
3'-UTR-mediated mRNA destabilization	RT	3	1.9	0.019	13.9
mitophagy	RT	3	1.9	0.021	13.2
regulation of pharyngeal pumping	RT	3	1.9	0.075	6.6
proteasome-mediated ubiquitin-dependent protein catabolic process	RT	3	1.9	0.1	5.6
actin filament severing	RT	2	1.2	0.035	55.8
positive regulation of innate immune response	RT	2	1.2	0.035	55.8
cortical granule exocytosis	RT	2	1.2	0.047	41.8
mitotic cell cycle arrest	RT	2	1.2	0.047	41.8
positive regulation of neurotransmitter secretion	RT	2	1.2	0.047	41.8
phosphatidylinositol-mediated signaling	RT	2	1.2	0.058	33.5
regulation of proteolysis	RT	2	1.2	0.069	27.9
protein targeting to vacuole	RT	2	1.2	0.08	23.9
phosphatidylinositol-3-phosphate biosynthetic process	RT	2	1.2	0.091	20.9
Table S5. DAVID analysis of significantly enriched gene ontology terms amongst computationally predicted mir-44 family targets. Some gene ontology terms overlap in associated genes.
